# Supplementary material for: Gut Microbiome of Indonesian Adults Differently Associated with Obesity and type 2 Diabetes under Varied Dietary Habits: A Cross-sectional Study in an Asian Developing City, Yogyakarta
Source: Research Square preprint supplement (doi:10.21203/rs.3.rs-135452/v1), 2020-12-30
Supplement: Supplementary file 1 [file 384bca1d413b7cf7909369fe.xlsx]

## Sheet: Supplementary Table S1
Supplementary Table S1| Physical and clinical characteristics of 75 Indonesian subjects
No.	ID	Group1	Group2	Gender	Age	Height	Weight	BMI	FBG	HbA1c	Dietary restriction	Metformin
					(year)	(cm)	(kg)	(kg/m2)	(mg/dL)	(%)
1	ID4Y102D	L	Non-T2D	Male	53	170	67.7	23.4256	100	5.9	nd	-
2	ID4Y103D	L	Non-T2D	Male	50	163	56	21.0772	86	5.3	nd	-
3	ID4Y104D	L	Non-T2D	Male	52	163	52	19.5717	97	5.8	nd	-
4	ID4Y105D	L	Non-T2D	Male	54	168	68	24.093	118	6.1	nd	-
5	ID4Y108D	L	Non-T2D	Male	58	160	56.7	22.1484	91	6	nd	-
6	ID4Y109D	L	Non-T2D	Male	60	172	74	25.0135	116	6.2	nd	-
7	ID4Y113D	L	Non-T2D	Male	39	172	65	21.9713	86	5.5	nd	-
8	ID4Y114D	L	Non-T2D	Male	34	172	72	24.3375	94	5.6	nd	-
9	ID4Y115D	L	Non-T2D	Male	51	169	68	23.8087	98	5.5	nd	-
10	ID4Y116D	L	Non-T2D	Male	55	153	55	23.4952	83	5.7	nd	-
11	ID4Y117D	L	Non-T2D	Male	38	170	65	22.4913	90	5.6	nd	-
12	ID4Y118D	L	Non-T2D	Male	53	165	55	20.202	91	5.8	nd	-
13	ID4Y119D	L	Non-T2D	Male	35	164	61	22.68	92	5.2	nd	-
14	ID4Y122D	L	Non-T2D	Male	52	167	67	24.0238	88	6.1	nd	-
15	ID4Y123D	L	Non-T2D	Male	39	172	73	24.6755	122	6.1	nd	-
16	ID4Y124D	L	Non-T2D	Male	57	168	68	24.093	99	5.7	nd	-
17	ID4Y126D	L	Non-T2D	Male	42	160	48	18.75	93	5.4	nd	-
18	ID4Y127D	L	Non-T2D	Male	40	171	72	24.623	94	5.5	nd	-
19	ID4Y128D	L	Non-T2D	Male	41	167	68	24.3824	84	5.2	nd	-
20	ID4Y129D	L	Non-T2D	Male	50	167	60	21.5139	78	5.7	nd	-
21	ID4Y130D	L	Non-T2D	Male	37	163	58.7	22.0934	85	5.4	nd	-
22	ID4Y219D	L	Non-T2D	Male	50	163	65.4	24.6152	76	5.3	nd	-
23	ID4Y220D	L	Non-T2D	Male	53	178	75	23.6713	101	6	nd	-
24	ID4Y222D	L	Non-T2D	Male	39	167	64	22.9481	100	5.5	nd	-
25	ID4Y233D	L	Non-T2D	Male	53	150	52.2	23.2	90	6	nd	Yes
26	ID4Y106D	OW	Non-T2D	Male	44	174	76	25.1024	88	5.1	nd	-
27	ID4Y301D	OW	Non-T2D	Male	45	171	85	29.0688	87	5.3	nd	-
28	ID4Y304D	OW	Non-T2D	Male	43	165	80	29.3848	92	5.8	nd	-
29	ID4Y308D	OW	Non-T2D	Male	44	178	92	29.0367	91	5.5	nd	-
30	ID4Y317D	OW	Non-T2D	Male	43	176	89	28.7319	90	5	nd	-
31	ID4Y325D	OW	Non-T2D	Male	42	169	84	29.4107	82	5.2	nd	-
32	ID4Y330D	OW	Non-T2D	Male	37	164	80	29.7442	93	5.5	nd	-
33	ID4Y303D	OB	Non-T2D	Male	34	175	126	41.1429	94	5.6	nd	-
34	ID4Y305D	OB	Non-T2D	Male	36	169.5	105	36.5468	88	5.6	nd	-
35	ID4Y306D	OB	Non-T2D	Male	52	160	80	31.25	106	5.7	nd	-
36	ID4Y307D	OB	Non-T2D	Male	50	172	98	33.126	90	5.2	nd	-
37	ID4Y311D	OB	Non-T2D	Male	55	166	97	35.201	91	5.7	nd	-
38	ID4Y312D	OB	Non-T2D	Male	39	167	90.8	32.5576	120	5.4	nd	-
39	ID4Y313D	OB	Non-T2D	Male	48	167	86	30.8365	94	5.9	nd	-
40	ID4Y314D	OB	Non-T2D	Male	45	165	86	31.5886	106	5.9	nd	-
41	ID4Y315D	OB	Non-T2D	Male	35	167	87	31.1951	100	6.2	nd	-
42	ID4Y316D	OB	Non-T2D	Male	41	172	100	33.8021	100	6.1	nd	-
43	ID4Y318D	OB	Non-T2D	Male	40	163	90	33.8741	81	5.5	nd	-
44	ID4Y319D	OB	Non-T2D	Male	45	166	90	32.6608	113	6.4	nd	-
45	ID4Y320D	OB	Non-T2D	Male	40	162	98	37.3419	98	5.7	nd	-
46	ID4Y321D	OB	Non-T2D	Male	45	172	92	31.0979	101	5.7	nd	-
47	ID4Y322D	OB	Non-T2D	Male	47	160.2	78.1	30.4317	84	5.6	nd	-
48	ID4Y323D	OB	Non-T2D	Male	53	166	86	31.2092	99	5.6	nd	-
49	ID4Y324D	OB	Non-T2D	Male	47	167	85	30.478	76	5.5	nd	-
50	ID4Y326D	OB	Non-T2D	Male	44	170	90	31.1419	98	5.9	nd	-
51	ID4Y125D	L	T2D	Male	60	163	65.3	24.5775	145	6.9	Yes	-
52	ID4Y201D	L	T2D	Male	46	178	70	22.0932	145	9.3	nd	Yes
53	ID4Y202D	L	T2D	Male	51	164	53.8	20.003	339	10.7	Yes	-
54	ID4Y203D	L	T2D	Male	57	178	78	24.6181	276	13.3	No	-
55	ID4Y205D	L	T2D	Male	44	168	68	24.093	141	7.2	Yes	-
56	ID4Y206D	L	T2D	Male	43	170	60	20.7612	359	14.6	Yes	Yes
57	ID4Y210D	L	T2D	Male	61	168	60	21.2585	188	7.5	Yes	Yes
58	ID4Y221D	L	T2D	Male	53	165	50	18.3655	275	12.1	nd	-
59	ID4Y230D	L	T2D	Male	56	174	68	22.46	148	7.3	nd	-
60	ID4Y236D	L	T2D	Male	63	172	70	23.6614	154	8.3	nd	-
61	ID4Y237D	L	T2D	Male	42	172	60	20.2812	156	8.3	nd	-
62	ID4Y112D	OW	T2D	Male	55	163	70	26.3465	133	7.6	No	-
63	ID4Y120D	OW	T2D	Male	52	160	65	25.3906	109	7.8	No	-
64	ID4Y204D	OW	T2D	Male	52	170	78	26.9896	129	9	nd	Yes
65	ID4Y212D	OW	T2D	Male	39	165	70	25.7117	140	8	nd	-
66	ID4Y213D	OW	T2D	Male	58	162	70	26.6728	239	9.9	No	-
67	ID4Y223D	OW	T2D	Male	51	160	76	29.6875	122	9.8	Yes	Yes
68	ID4Y224D	OW	T2D	Male	57	159	74	29.271	136	7.8	nd	-
69	ID4Y225D	OW	T2D	Male	46	165	70	25.7117	194	10.5	nd	Yes
70	ID4Y226D	OW	T2D	Male	57	170	73	25.2595	120	6.8	nd	-
71	ID4Y228D	OW	T2D	Male	52	160	71	27.7344	187	8	nd	Yes
72	ID4Y234D	OW	T2D	Male	58	160	70	27.3438	272	10.6	nd	-
73	ID4Y328D	OB	T2D	Male	37	168	140	49.6032	120	6.8	No	-
74	ID4Y402D	OB	T2D	Male	51	159	82	32.4354	131	6.6	Yes	-
75	ID4Y403D	OB	T2D	Male	50	169	90	31.5115	163	8.5	No	-
nd: no data, L: lean, OW: overweight, OB: obese, Non-T2D: not considered as type 2 diabetes, T2D: type 2 diabetes.

## Sheet: Supplementary Table S2
Supplementary Table S2| Average macro nutrient consumption of Indonesian subjects a day
Category:	All subjects (n=75)			Non-T2D (n=50)			T2D (n=25)			p1	Lean (n=35)			Overweight (n=19)			Obese (n=21)			p2
	Average	±	s.e.	Average	±	s.e.	Average	±	s.e.		Average	±	s.e.	Average	±	s.e.	Average	±	s.e.
Calorie intake (kcal)
Carbohydrate	1005.6	±	342.9	1058.6	±	294.4	899.7	±	410	0.032	918.9	±	292a	1020	±	407.4	1137	±	330.7a	0.045
Protein	220.4	±	76.7	219.4	±	70.2	222.4	±	90	0.955	193.1	±	71a	236	±	79.7	251.9	±	70.1a	0.011
Fat	528.7	±	240.5	550.6	±	243.3	484.9	±	233.4	0.278	430	±	201.2a	555	±	233.8	669.6	±	239.5a	0.001
Total energy	1766.2	±	576	1831.9	±	554.3	1634.8	±	625.6	0.107	1570.1	±	447.9a	1804.1	±	662.3	2058.7	±	577.5a	0.007
Relative energy (%)
Carbohydrate	57.6	±	9.5	58.5	±	6.9	55.6	±	13.2	0.54	59.5	±	12.1a	56.4	±	6.8	55.4	±	5.2a	0.012
Protein	12.6	±	2.2	12	±	1.9	13.6	±	2.4	0.005	12.3	±	2.4a	13.2	±	1.7	12.4	±	2.1a	0.011
Fat	29.1	±	7	29.2	±	6.9	29.1	±	7.3	0.987	26.5	±	7.3a	30.7	±	6.4	32.1	±	5.4a	0.001
p1:The statistical significance between non-T2D and T2D groups was assessed by Wilcoxon rank-sum test.
p2: The statistical significance between lean, overweight, and obese groups was assessed by Wilcoxon rank-sum with Bonferroni adjustment.
a indicates significantly difference between pair.

## Sheet: Supplementary Table S3
Supplementary Table S3| Multiple linear regression of three macronutrients intake for BMI
Nutrient	Coefficients	±	s.e.	p	Beta
Non-T2D group (n=50, adjusted R2 = 0.208)
fat	9.06	±	4.34	0.042*	0.43
carbohydrate	-2.22	±	3.29	0.504	-0.13
protein	13.85	±	15.6	0.379	0.19
constant	21.83	±	2.52	<0.001
T2D group (n=25, adjust R2 = -0.047)
fat	9.59	±	10.79	0.384	0.37
carbohydrate	2.61	±	3.9	0.511	0.18
protein	-19.59	±	28.13	0.494	-0.29
constant	23.43	±	3.56	<0.001

## Sheet: Supplementary Table S4
Supplementary Table S4| OTU table of 16S rRNA genes with taxonomy amplified from fecal sampples of Indonesian subjects (rarified at 10,000 reads per sample)
Subject ID:	ID4Y102D	ID4Y103D	ID4Y104D	ID4Y105D	ID4Y106D	ID4Y108D	ID4Y109D	ID4Y112D	ID4Y113D	ID4Y114D	ID4Y115D	ID4Y116D	ID4Y117D	ID4Y118D	ID4Y119D	ID4Y120D	ID4Y122D	ID4Y123D	ID4Y124D	ID4Y125D	ID4Y126D	ID4Y127D	ID4Y128D	ID4Y129D	ID4Y130D	ID4Y201D	ID4Y202D	ID4Y203D	ID4Y204D	ID4Y205D	ID4Y206D	ID4Y210D	ID4Y212D	ID4Y213D	ID4Y219D	ID4Y220D	ID4Y221D	ID4Y222D	ID4Y223D	ID4Y224D	ID4Y225D	ID4Y226D	ID4Y228D	ID4Y230D	ID4Y233D	ID4Y234D	ID4Y236D	ID4Y237D	ID4Y301D
OTU ID
Otu1	1380	967	675	1130	787	340	697	751	1323	1199	929	980	1338	311	495	866	999	306	1241	922	901	720	1192	1167	919	966	383	1230	68	853	326	1077	801	748	1232	668	1535	603	1066	544	692	701	1132	1022	1120	1	549	568	832
Otu2	1198	551	586	118	440	58	306	227	1047	625	615	1359	640	978	433	610	1295	542	107	226	474	1172	239	219	524	1565	171	3	131	235	575	347	932	868	1242	1712	82	284	878	1252	449	453	547	363	232	46	129	524	193
Otu3	102	98	386	1051	135	132	60	529	48	246	104	6	348	263	340	371	12	90	448	394	305	305	104	164	82	15	32	161	0	362	90	103	381	14	6	133	531	83	21	22	13	161	34	494	3	3	343	173	972
Otu4	370	216	257	262	286	248	163	257	139	268	328	109	260	285	238	452	722	331	744	167	161	180	125	134	293	1044	216	33	529	733	445	1504	189	512	365	263	195	487	520	440	330	246	187	274	274	61	1486	328	408
Otu5	109	96	10	94	62	1186	570	97	17	56	103	27	40	14	31	934	2	732	22	453	102	251	144	74	570	59	84	53	278	4	15	15	54	0	28	16	127	22	99	13	476	49	208	193	196	354	163	22	49
Otu6	905	0	4	1525	1277	46	135	883	921	1826	1314	2	533	281	821	859	798	1324	107	56	1166	908	835	735	626	0	6	2	750	274	3	39	916	1597	1438	3	15	1539	948	1354	876	1309	112	1440	17	3	0	594	359
Otu7	17	10	472	121	16	7	0	214	610	39	4	55	144	36	204	107	69	12	0	17	62	159	39	50	36	38	67	212	13	1	37	85	170	26	2	636	56	171	23	1	251	518	70	0	1	39	10	21	116
Otu8	163	3	98	412	348	432	116	986	10	9	13	8	47	827	254	259	32	132	254	601	1076	285	284	426	280	31	84	6	0	7	75	5	34	9	12	64	903	149	42	143	6	436	9	454	1	26	443	133	1313
Otu9	214	99	126	30	65	100	213	117	39	167	113	1	53	53	262	109	122	104	99	215	78	217	159	128	70	163	52	11	144	171	2	200	43	207	230	145	273	279	365	205	214	473	214	161	147	2	199	134	76
Otu10	213	153	136	93	102	170	137	73	79	151	167	53	159	220	130	94	223	114	109	156	71	191	145	137	144	114	178	134	76	176	24	23	119	198	121	135	63	115	233	154	159	188	181	140	83	25	73	153	142
Otu11	293	118	279	146	46	4	246	16	138	39	72	492	51	90	21	18	169	32	260	38	21	30	51	49	35	34	27	29	18	77	0	7	46	375	126	379	168	53	49	70	49	116	219	213	92	242	432	32	11
Otu12	98	18	25	150	26	18	38	160	153	60	71	68	86	82	131	90	186	44	220	20	31	92	64	42	114	219	123	56	66	21	0	89	46	84	62	310	136	37	74	43	42	140	95	226	35	15	0	48	53
Otu13	170	259	5	0	21	40	0	176	0	1	142	76	0	137	557	0	285	0	0	0	144	1	57	72	129	0	176	0	0	28	0	0	212	2	110	0	1	266	635	0	275	94	0	0	216	2	0	230	9
Otu14	112	159	409	265	85	333	189	152	93	79	73	174	197	161	410	110	212	94	196	68	182	168	196	165	296	266	191	263	203	160	584	684	59	29	131	254	210	210	951	158	202	282	257	125	168	74	206	228	239
Otu15	0	1	2	1	169	2	1090	691	0	1	689	1	0	254	290	0	1	256	0	0	0	2	420	502	0	0	2	0	0	0	0	2	0	2	0	0	2	917	5	0	0	0	2	0	2043	0	0	651	0
Otu16	55	234	104	99	75	65	128	51	201	303	180	84	99	79	40	37	198	181	24	476	70	73	318	331	527	259	204	31	225	250	406	17	117	16	235	99	13	86	60	102	141	85	35	401	61	81	178	124	3
Otu17	35	33	23	126	124	84	111	67	162	121	125	40	97	16	165	49	88	207	96	165	29	67	248	200	243	115	286	157	6	149	0	40	67	140	130	78	157	66	14	191	73	115	30	241	116	118	380	90	27
Otu18	399	0	1	7	318	28	454	308	1	63	204	5	373	3	25	244	155	62	35	139	4	334	49	34	47	0	0	0	0	7	0	27	286	162	0	111	112	29	534	365	343	1	0	7	14	0	1	881	0
Otu19	3	2	592	425	549	188	0	197	1	11	119	82	144	316	606	91	0	214	141	477	25	244	311	322	0	108	18	297	1	227	1	483	70	24	55	543	552	372	0	16	7	281	1132	0	25	0	987	6	0
Otu20	0	0	622	97	0	0	0	101	377	0	0	0	0	0	0	61	4	0	0	0	274	493	133	143	10	0	94	6	122	0	0	156	200	1	0	0	2	5	99	5	250	1	602	56	0	1	0	7	3
Otu21	1	92	0	0	231	196	0	213	0	201	146	0	0	61	377	143	399	169	2	370	217	0	2	1	111	1436	652	1	1081	438	0	8	67	0	454	477	2	367	51	340	116	311	0	0	275	0	1	20	212
Otu22	63	145	38	13	156	9	80	4	32	127	31	111	97	36	37	30	23	32	15	54	77	223	75	58	103	59	63	1	29	25	165	0	88	31	1	13	35	59	37	30	75	48	48	72	86	3	85	57	16
Otu23	28	198	472	149	118	56	46	1	36	215	6	657	273	17	16	3	21	192	397	89	9	126	137	144	8	42	144	734	45	7	1590	35	19	90	100	446	158	62	17	41	20	24	295	8	28	1287	416	28	129
Otu24	0	0	0	0	0	63	0	317	0	0	682	0	0	0	2	0	0	0	0	0	0	328	0	0	0	0	0	0	0	0	1	0	163	0	0	0	0	0	0	2	214	0	0	0	2	0	0	151	0
Otu25	0	0	0	0	0	0	0	110	0	237	0	1	0	0	71	0	0	219	1	118	45	0	1	1	416	0	0	0	0	0	0	0	0	337	0	0	117	0	10	0	0	0	0	0	71	0	1	0	48
Otu26	0	2	0	1	154	1	0	55	0	133	51	2	170	272	76	45	0	113	0	52	95	72	70	89	0	0	0	30	0	0	0	97	0	82	0	23	40	58	243	176	0	7	124	0	26	0	2	0	1
Otu27	148	852	0	75	0	1	33	0	100	0	0	68	106	0	0	0	258	0	0	6	24	125	7	11	143	562	1	4	2634	0	0	0	5	0	0	0	0	2	143	31	494	62	395	4	1	0	0	87	2
Otu28	95	2	158	36	0	0	0	7	26	1	2	16	39	0	0	2	9	0	0	2	2	15	23	25	13	73	32	14	60	0	647	14	1	4	0	81	46	6	1	2	14	4	6	3	0	1013	53	0	9
Otu29	189	79	341	462	144	141	274	305	135	227	167	400	139	108	335	225	197	190	157	274	179	261	192	186	169	204	429	240	39	484	353	552	89	200	396	378	101	161	260	193	184	840	176	180	308	298	322	178	271
Otu30	0	68	121	30	47	18	58	12	97	13	56	370	43	59	116	104	151	16	80	65	125	34	27	39	20	169	51	397	24	78	42	678	7	223	18	151	91	91	41	131	25	93	20	18	16	331	382	52	59
Otu31	46	16	42	125	123	0	0	426	16	33	3	106	30	5	39	56	18	7	41	43	16	3	53	53	29	12	28	0	281	69	91	86	4	1	2	28	22	20	72	7	2	102	10	21	2	33	13	0	16
Otu32	89	1	199	48	63	0	0	49	105	0	32	174	33	1	165	24	106	17	156	49	0	38	0	2	147	0	0	0	0	1	57	0	336	23	0	17	156	10	36	1	75	2	0	67	18	0	2	142	126
Otu33	1	4	50	76	18	1	81	6	53	78	4	52	24	2	4	31	13	17	0	168	38	65	16	23	5	100	13	2	32	93	1	0	1	200	0	141	23	4	1	118	6	1	19	83	15	0	180	8	0
Otu34	35	313	109	11	36	1	85	9	11	93	36	186	36	85	9	15	33	29	26	110	5	75	55	68	11	60	6	85	2	83	74	3	18	176	19	49	59	19	0	87	9	6	47	39	76	13	13	38	1
Otu35	161	96	1	19	41	69	94	25	59	26	23	77	119	3	106	18	31	40	186	31	76	34	75	72	36	7	172	105	2	32	0	67	50	27	35	27	76	16	10	31	39	67	81	0	24	0	0	64	53
Otu36	78	46	57	34	46	88	67	22	18	29	31	0	24	44	32	28	53	32	42	41	66	51	45	47	24	45	152	80	1	64	0	49	39	49	20	35	42	10	0	45	17	20	9	16	109	106	24	50	34
Otu37	1	0	1	1	35	1	56	8	222	53	0	75	88	0	72	15	102	77	75	1	0	12	61	63	1	0	0	114	0	7	0	1	53	6	0	3	13	0	0	22	8	0	1	0	0	0	1	0	0
Otu38	2	0	64	49	3	8	23	133	1	177	0	1	25	0	10	6	0	0	192	0	19	47	26	35	3	2	33	48	0	0	2	0	8	0	0	0	80	3	0	0	27	14	1	151	1	0	281	14	3
Otu39	90	0	0	68	169	0	0	0	0	0	82	0	0	89	0	1	0	0	0	116	0	5	0	0	1	358	0	13	0	86	0	865	729	319	0	73	2	0	129	1	0	0	0	0	140	0	0	0	0
Otu40	89	48	58	20	50	40	19	3	15	109	71	0	25	42	33	14	97	18	101	94	65	53	24	24	26	51	25	31	0	59	0	12	45	10	34	0	0	4	13	0	46	28	39	33	31	128	2	26	33
Otu41	70	6	83	14	36	302	26	43	36	5	24	28	121	112	79	28	7	40	279	49	50	48	112	112	13	1	214	340	0	41	2	128	76	27	25	29	142	10	25	4	10	18	35	16	104	1	0	84	297
Otu42	0	0	0	0	134	1	0	0	0	0	0	0	0	0	0	0	0	0	0	570	0	0	0	0	0	1	0	438	2	608	0	0	189	0	0	0	0	0	1	0	0	0	0	0	126	0	0	0	0
Otu43	36	1211	0	0	0	7	132	0	87	0	0	14	0	0	0	0	99	1	355	43	0	0	80	66	12	11	1	0	20	0	0	0	1	40	0	0	1	55	144	0	0	0	0	5	0	0	0	3	0
Otu44	42	56	48	0	30	0	29	0	0	84	18	35	23	60	0	101	0	0	57	75	0	74	46	51	9	44	66	26	0	4	22	129	47	33	0	19	2	95	288	38	0	167	41	35	0	0	0	0	303
Otu45	94	0	627	39	0	0	2	8	0	3	0	47	40	6	10	6	19	53	56	0	1	195	32	47	74	0	0	0	1	2	732	10	14	0	0	3	35	55	1	213	444	2	0	3	8	0	10	42	204
Otu46	37	2	0	2	5	1	0	11	0	0	0	1	3	0	0	89	4	29	0	10	26	1	19	8	52	0	5	0	0	0	5	2	0	1	0	0	3	0	9	1	447	0	0	0	9	692	126	97	6
Otu47	32	24	162	32	38	25	32	25	46	94	22	71	54	54	27	21	95	53	60	60	9	63	205	186	30	23	45	18	13	110	251	6	26	175	99	31	32	32	80	111	55	66	153	47	142	86	20	63	17
Otu48	30	13	9	119	7	158	328	83	1	16	19	1	28	1	0	411	0	60	11	85	37	0	68	81	332	2	67	35	0	2	3	0	33	1	79	46	8	99	24	17	49	38	2	3	67	55	66	74	2
Otu49	0	0	1	100	11	84	1	2	0	0	0	0	13	0	62	0	19	26	0	0	258	0	0	0	71	0	94	7	37	89	0	0	0	0	99	105	124	0	0	0	73	0	0	4	1	0	0	58	0
Otu50	273	0	0	30	0	0	39	0	5	0	0	0	114	0	0	1	0	0	1	0	0	0	0	0	0	0	0	0	0	0	0	0	409	0	0	0	0	0	0	0	53	22	1	0	0	0	0	0	0
Otu51	40	69	47	7	62	6	33	4	54	60	54	16	35	17	10	41	77	26	25	44	9	34	51	50	41	31	17	13	0	53	42	0	38	21	37	88	32	6	35	55	13	8	50	74	43	97	3	85	13
Otu52	78	1	0	0	0	0	136	0	115	27	0	23	177	0	0	0	73	9	16	82	0	1	70	69	0	0	55	13	14	0	53	0	0	31	87	19	2	108	10	23	0	4	39	0	4	6	0	0	63
Otu53	24	61	6	7	127	2	14	5	7	171	20	138	7	128	53	16	19	30	11	91	15	42	37	44	111	11	29	6	0	290	9	12	73	346	27	18	51	47	1	34	49	8	23	53	307	88	23	55	23
Otu54	56	3	141	4	3	54	2	158	6	2	0	3	3	21	7	69	0	64	0	1	61	18	120	163	0	1	40	63	0	0	77	0	16	0	0	5	104	2	0	2	12	0	7	24	0	1	87	0	13
Otu55	19	2	95	72	1	94	35	9	36	15	6	0	76	10	57	36	7	13	128	3	5	17	61	47	59	15	0	50	1	12	179	30	6	5	10	21	49	25	12	31	8	12	39	6	5	0	0	117	85
Otu56	0	0	0	0	8	110	0	1	1	0	4	0	4	0	6	2	0	0	0	0	0	71	7	0	0	2	89	1306	0	9	1	0	15	0	0	0	34	1	4	0	2	1	0	3	0	0	0	1	0
Otu57	2	933	0	1	310	0	0	0	0	0	0	0	0	0	29	0	0	0	0	138	607	0	0	0	80	0	0	0	0	0	0	0	1	0	0	0	0	0	33	0	0	0	0	0	0	0	0	0	0
Otu58	5	23	52	25	2	0	51	7	17	35	0	48	36	4	2	0	1	2	2	6	3	85	58	77	3	47	7	184	3	73	1	67	0	58	15	36	0	38	101	5	6	0	53	0	0	0	9	0	2
Otu59	26	0	0	0	92	1	0	11	0	122	17	0	11	15	5	9	139	0	0	1	18	81	35	29	21	0	10	0	0	36	1	2	35	0	32	0	0	3	1	96	20	0	0	48	11	1	0	41	0
Otu60	68	63	150	12	65	7	20	0	23	6	1	239	28	6	3	8	10	17	24	5	1	4	9	16	0	1	87	106	4	4	253	28	3	23	17	163	422	5	7	10	1	4	12	10	8	7	0	26	39
Otu61	40	36	85	2	6	11	29	0	33	17	0	52	42	13	5	15	17	61	70	24	5	47	16	16	4	1	17	98	5	12	0	3	7	15	18	15	167	16	12	0	11	19	2	12	4	80	0	13	57
Otu62	8	0	0	5	0	0	92	1	0	0	0	0	0	0	0	0	42	8	0	132	0	0	0	0	2	0	0	0	0	0	0	0	6	0	62	0	0	255	5	0	0	152	0	0	1	0	0	0	0
Otu63	37	1	26	99	9	10	37	3	48	41	6	82	21	19	5	35	308	41	3	102	1	7	25	25	0	116	61	14	13	152	2	9	1	100	216	90	46	83	3	35	7	239	58	128	7	95	18	7	13
Otu64	2	0	0	0	26	182	47	12	7	4	6	1	17	147	105	9	1	7	153	14	14	9	11	14	19	0	8	40	0	2	0	16	107	7	4	2	297	7	13	10	9	0	15	0	11	1	0	35	86
Otu65	0	0	1	0	3	35	0	1	0	0	0	0	10	126	38	2	0	0	0	3	0	13	36	34	0	0	487	12	0	0	0	0	54	0	0	0	0	1	0	0	5	10	7	0	177	0	0	16	0
Otu66	0	58	0	0	35	2	14	43	0	77	32	78	2	0	171	54	64	0	0	73	2	0	0	0	0	0	0	35	0	19	1	143	11	69	0	0	3	36	0	49	53	0	0	23	24	0	0	0	0
Otu67	0	0	0	0	0	0	0	0	0	0	0	0	0	0	0	0	96	0	0	0	0	0	0	0	0	0	0	1	413	0	0	1	0	0	18	125	0	0	0	0	0	0	0	1	0	0	0	0	0
Otu68	0	0	0	0	0	0	0	0	0	1	0	0	0	0	0	0	0	0	0	0	0	0	0	0	29	0	0	5	0	0	0	0	112	0	0	0	0	0	0	0	0	0	0	0	0	0	0	0	0
Otu69	73	6	173	120	47	17	75	59	17	54	39	275	45	34	34	17	108	88	8	52	58	66	97	83	54	9	51	6	7	124	11	161	21	81	139	100	25	54	101	50	48	294	61	19	60	77	89	27	35
Otu70	0	0	0	0	86	0	1	3	0	0	161	0	0	0	0	1	0	168	0	0	1	143	0	0	0	506	45	0	267	93	0	0	78	369	0	0	9	0	0	0	0	0	0	0	3	0	0	0	0
Otu71	22	0	83	60	92	3	30	14	2	0	52	56	40	13	4	32	62	11	4	166	19	35	51	60	5	20	24	6	2	42	1	0	156	16	111	25	32	52	12	30	63	3	24	49	146	0	116	77	3
Otu72	60	0	8	13	0	0	0	0	61	3	0	0	165	0	0	0	0	36	0	0	0	0	21	33	67	0	17	9	226	0	0	0	118	0	0	0	0	1	3	0	256	0	231	0	0	0	0	6	0
Otu73	0	0	0	2	0	0	0	0	0	0	0	33	0	0	0	0	0	6	0	0	0	1	0	0	64	6	0	0	17	0	0	0	0	0	0	7	0	0	0	0	0	0	3	0	0	0	0	0	0
Otu74	0	0	0	0	0	0	91	0	0	0	0	1	490	0	0	0	0	0	0	0	0	0	0	0	10	0	0	0	1	0	0	0	0	0	0	0	0	0	1	0	10	10	0	0	0	0	0	0	0
Otu75	100	0	0	0	5	296	56	0	30	1	4	4	5	13	34	16	6	35	63	4	0	2	19	13	26	1	0	122	0	0	0	68	44	0	0	0	1	0	1	1	14	1	30	0	0	0	0	20	251
Otu76	9	29	5	0	19	84	22	16	8	22	28	19	28	36	31	19	14	10	12	15	17	11	26	25	15	0	8	19	5	25	15	76	23	28	40	2	9	30	29	4	17	17	27	3	45	0	0	11	240
Otu77	6	0	0	4	6	1	2	0	0	0	0	1	0	3	0	54	9	17	1	12	9	8	3	5	0	1	3	0	118	0	1	7	0	0	1	0	0	3	45	0	53	0	3	3	41	144	58	32	0
Otu78	0	0	0	0	47	437	0	29	0	0	4	0	0	0	144	0	0	0	0	102	23	0	31	32	10	0	0	0	0	12	0	0	38	0	0	0	0	0	0	0	0	0	0	0	135	0	0	97	0
Otu79	8	55	8	12	3	17	22	9	6	14	11	2	13	13	10	19	30	15	10	12	8	12	6	10	19	34	26	7	6	24	0	25	4	26	39	13	16	24	12	26	4	22	9	16	16	0	36	17	16
Otu80	29	185	76	7	32	6	27	10	30	40	17	58	17	25	5	21	50	26	19	24	11	45	27	19	14	18	6	39	1	61	118	0	29	47	32	14	6	2	2	40	7	4	18	52	19	33	24	73	2
Otu81	0	0	0	0	30	65	0	10	0	17	16	0	49	3	2	0	0	28	101	91	37	0	69	56	0	0	0	0	16	0	0	0	43	55	0	64	1	41	19	0	10	0	0	0	5	0	0	39	0
Otu82	2	0	1	0	0	0	0	0	0	0	0	11	1	1	0	2	0	5	0	0	0	5	3	1	0	0	1	31	0	0	0	0	0	33	0	11	1	0	0	0	2	0	3	1	1	681	33	0	1
Otu83	0	0	0	0	0	6	5	0	1	0	0	0	0	0	0	0	0	0	0	0	0	0	1	1	0	0	1360	0	0	0	0	53	0	0	1	8	11	45	0	1	0	0	9	0	0	75	0	0	0
Otu85	104	11	65	46	16	15	13	18	31	24	40	23	24	9	11	22	22	35	74	14	11	25	21	23	44	30	0	14	13	24	84	4	18	14	21	28	5	54	14	22	16	40	50	33	104	1	6	41	17
Otu86	222	0	0	0	0	0	0	94	0	50	95	0	0	17	8	1	0	31	0	0	61	0	0	0	92	0	0	0	0	2	0	0	22	0	0	0	0	0	0	0	1	0	0	0	0	0	0	88	0
Otu88	0	0	0	60	0	0	0	0	16	13	0	16	41	0	0	6	0	0	49	0	0	0	9	13	0	0	1	65	103	0	0	0	0	0	0	0	0	0	0	0	0	0	32	0	0	1	0	0	0
Otu89	8	27	0	0	16	9	31	4	13	13	35	28	31	50	10	16	14	9	70	18	9	7	12	13	10	1	2	76	0	29	2	6	13	13	10	14	28	6	0	0	3	1	14	5	6	11	4	16	5
Otu90	37	499	0	72	67	12	0	48	133	340	162	0	1	30	61	103	101	121	1	0	163	48	159	130	26	0	1	0	46	42	0	39	118	267	107	0	2	507	4	231	56	53	0	153	1	1	0	82	44
Otu92	4	83	20	11	87	14	2	0	9	18	1	23	28	6	0	2	4	29	33	19	11	15	30	38	0	5	5	22	0	7	7	9	0	13	16	9	21	32	7	14	4	2	1	0	1	5	302	1	10
Otu96	0	0	0	0	7	496	0	12	0	1	5	0	0	100	9	0	0	0	41	0	0	0	0	0	6	0	170	0	0	0	0	0	10	0	0	0	0	0	0	1	2	0	0	0	0	0	0	21	123
Otu97	0	0	0	0	49	0	5	0	0	95	0	1	30	23	0	0	0	78	0	0	2	0	20	32	136	0	8	2	84	18	0	134	74	28	0	25	71	4	72	73	76	296	0	0	0	0	0	81	0
Otu98	0	2	1	0	9	64	145	1	5	0	1	0	0	33	9	4	6	0	0	23	0	0	16	6	6	0	21	134	0	4	1	0	4	86	0	0	8	25	1	0	20	0	10	0	102	0	0	5	127
Otu99	0	70	46	30	77	35	35	36	21	46	54	1	57	70	63	38	81	53	82	55	45	32	64	82	65	27	125	21	62	58	92	21	47	58	60	71	40	61	156	69	84	89	64	67	66	44	40	49	14
Otu100	21	34	31	24	22	34	39	18	21	39	14	71	46	39	5	23	28	19	49	25	11	18	23	26	38	16	27	44	0	20	36	9	20	23	34	26	36	17	41	33	28	48	42	38	31	56	4	20	56
Otu102	0	0	0	0	7	0	0	69	0	0	9	0	0	0	34	163	0	0	2	0	255	0	0	0	159	1	0	1	0	0	0	6	0	0	0	0	0	0	0	0	229	0	0	191	1	0	0	144	0
Otu103	12	0	0	2	17	0	0	3	1	42	2	3	0	40	52	13	42	77	48	12	27	53	172	189	1	0	0	2	1	167	0	59	21	103	0	0	4	18	2	58	11	0	178	11	4	0	0	2	87
Otu105	8	2	58	7	49	1	46	18	6	82	3	198	27	14	26	12	0	14	2	0	2	38	11	21	3	43	0	0	0	130	35	0	80	30	1	13	3	21	0	25	3	7	0	0	15	0	26	44	0
Otu106	36	0	0	0	10	182	17	6	0	2	0	0	48	21	96	3	0	0	18	15	0	21	9	12	4	0	0	26	0	0	0	5	44	9	0	0	0	6	0	0	6	3	0	0	44	0	0	46	2
Otu110	77	0	0	29	0	0	76	0	28	0	0	0	40	0	0	0	22	65	37	19	2	0	57	45	0	39	0	6	116	0	0	43	0	0	226	0	0	0	0	2	0	0	114	0	0	0	0	0	49
Otu111	21	3	0	0	21	152	1	0	0	21	41	39	2	176	29	8	6	0	39	34	17	4	27	14	2	0	0	17	0	23	0	1	13	16	0	0	30	1	0	0	12	0	0	0	76	0	18	7	17
Otu114	3	2	1	9	22	1	0	26	4	1	3	110	16	1	2	37	3	1387	2	5	20	1	4	2	50	5	32	2	22	2	38	0	4	1	4	6	12	6	11	1	24	30	3	7	3	25	122	0	3
Otu116	11	107	8	3	10	2	16	0	27	14	25	7	8	9	1	5	30	9	5	4	2	23	21	14	8	6	2	5	5	11	49	1	15	18	23	38	1	0	12	24	3	2	31	19	18	0	5	27	0
Otu118	0	1	0	0	0	0	0	0	0	0	12	0	0	142	0	168	0	0	0	0	5	0	0	0	9	0	0	0	0	0	0	0	14	0	0	0	0	1	0	0	6	0	0	0	4	0	0	15	226
Otu125	14	8	44	9	5	9	4	0	2	18	0	55	21	1	0	0	12	6	28	3	2	7	25	14	2	0	4	19	1	3	187	0	2	23	10	9	29	18	2	3	1	2	1	3	0	265	342	3	26
Otu135	22	0	0	0	26	19	13	30	2	4	11	0	9	30	14	13	11	11	10	18	9	2	24	17	11	1	5	65	0	16	0	10	9	43	15	15	29	14	39	15	22	12	37	7	46	32	0	29	6
Otu137	22	1	16	9	4	11	19	0	18	19	0	42	46	0	0	0	16	12	10	12	1	0	25	24	0	5	34	32	4	26	1	3	0	77	57	10	0	16	4	23	0	3	41	2	6	0	15	2	0
Otu143	0	0	0	1	78	1	0	0	106	0	85	0	0	64	1	0	0	19	0	0	0	95	58	75	0	0	18	0	1	90	0	0	0	0	0	0	0	16	54	84	0	0	0	88	0	1	0	86	0
Otu151	0	5	1	1	0	0	0	0	0	0	0	7	40	0	42	0	0	0	0	0	0	1	3	3	2	6	260	38	0	8	45	0	6	0	0	31	120	6	0	0	0	0	36	18	0	7	149	71	1
Otu165	19	53	17	8	10	80	18	1	14	25	0	24	19	2	3	6	3	14	49	2	5	9	23	18	2	0	98	104	35	8	24	5	6	33	21	24	30	11	3	18	5	15	42	54	11	1	35	16	38
Otu171	0	0	0	0	123	0	0	30	0	0	59	0	0	0	2	98	0	1	218	0	277	0	0	0	0	0	0	0	0	0	0	0	0	0	0	0	0	0	38	0	35	0	0	251	0	0	1	40	0
Otu173	1	0	3	0	22	0	1	16	0	13	13	140	7	13	61	14	20	8	10	46	0	29	0	0	17	0	9	0	0	83	0	0	16	21	0	85	0	52	3	9	2	2	0	0	35	0	44	17	0
Otu181	8	29	31	0	33	1	12	7	1	16	3	113	15	29	1	9	4	2	3	3	1	17	14	20	19	75	4	1	0	40	0	0	10	8	0	40	1	13	0	5	3	0	5	8	0	0	0	42	0
Otu190	5	14	8	5	10	1	3	1	10	20	11	0	5	7	11	7	12	6	3	13	2	4	11	7	5	10	1	6	2	491	14	0	6	1	4	24	59	0	5	8	1	1	8	5	3	21	0	10	4
Otu234	0	0	102	0	0	0	0	0	0	0	0	0	0	0	0	188	0	0	118	0	0	0	0	0	0	0	0	0	1	0	1	198	0	0	0	0	0	0	0	0	0	7	0	0	0	0	0	1	0
Otu306	6	357	90	44	5	6	2	0	24	26	0	0	11	0	2	0	19	9	0	0	7	18	2	1	8	0	0	31	0	7	209	3	0	18	14	24	5	0	7	29	2	3	15	0	1	0	138	1	5
Otu324	1	0	0	0	0	0	0	1	0	1	0	0	0	0	0	0	5	0	0	0	0	0	0	0	8	0	0	0	0	0	2	0	0	0	0	0	0	0	0	0	3	0	0	0	0	199	0	0	0
Otu333	37	61	146	213	16	169	79	32	76	72	25	82	284	74	63	51	29	25	247	23	31	32	71	72	24	2	26	394	88	9	499	130	20	15	27	144	141	57	16	0	39	118	366	9	25	1	12	19	259
Otu335	56	0	0	555	41	6	86	17	139	180	39	608	0	56	6	103	7	2	109	25	262	9	145	123	467	0	0	0	0	11	1	91	6	28	0	10	185	1	2	73	6	26	0	320	6	0	0	0	85
Otu376	187	0	0	21	439	75	764	116	1660	275	1117	0	441	63	124	695	639	516	52	35	688	123	484	409	319	0	6	0	638	199	2	117	219	10	953	2	0	373	191	1519	490	266	738	1146	18	0	0	708	185
Otu461	0	0	13	0	17	2	0	49	4	0	85	0	14	15	0	11	16	0	0	5	0	69	4	15	65	109	1	0	1	123	0	0	4	16	0	36	0	3	0	0	0	0	5	22	0	0	0	0	0
Otu488	31	13	10	32	14	1	21	4	11	6	5	0	16	5	9	12	24	9	18	135	36	6	31	39	13	3	1	11	0	5	0	14	4	22	25	11	18	13	9	0	13	20	16	70	13	8	34	8	5
Otu489	4	99	0	22	1	0	0	5	62	0	43	11	0	4	0	5	58	0	0	3	36	19	11	11	1	271	107	0	333	0	4	60	0	92	0	95	3	0	20	11	0	31	34	16	0	1515	33	35	2
Otu505	37	24	11	93	32	175	267	152	11	61	35	4	42	1	1	188	1	37	4	130	45	0	94	77	180	0	27	20	4	4	2	0	8	2	53	25	8	180	39	43	40	62	2	1	60	37	91	8	4
Otu583	9	0	1	7	2	31	90	8	1	4	9	2	1	2	1	85	1	56	0	50	4	5	4	4	70	6	7	6	0	0	1	1	6	0	0	0	10	8	8	0	25	1	32	0	30	2	11	0	0
Otu632	29	0	1	18	3	0	0	40	6	0	0	142	9	0	0	141	0	5	0	0	21	0	1	5	10	1	29	1	26	1	26	0	21	0	0	0	23	0	0	0	0	14	25	0	1	536	22	1	0
a: Taxonomy of OTUs was identified in SINTAX with the reference sequence database from RDP training set v16 (https://sourceforge.net/projects/rdp-classifier/).
b: Known closest species among the 16S rRNA database of type strains in EzBioCloud (https://www.ezbiocloud.net).
[truncated: 29 more columns]

## Sheet: Supplementary Table S5
Supplementary Table S5| Correlation of bacteria families, genera, and OTUs to carbohydrate intake ratio (p < 0.05 in linear regression analysis)
Family	Taxonomy	linear regression		Mean relative abundance
		Beta	p	nonT2D			T2D
				Lean	Overweight	Obese	Lean	Overweight	Obese
f60	k__Bacteria;p__Firmicutes;c__Clostridia;o__Clostridiales;f__Ruminococcaceae	0.394593	0.0055141	0.194903	0.16558	0.129947	0.232687	0.157718	0.196264
f17	k__Bacteria;p__"Lentisphaerae";c__Oligosphaeria;o__Oligosphaerales;f__Oligosphaeraceae	0.379745	0.0077647	8e-06	0	0	0	0	0
f18	k__Bacteria;p__"Proteobacteria";Other;Other;Other	0.3711	0.00941137	0.000313667	0	0	0	0	0
f5	k__Bacteria;p__"Actinobacteria";c__Actinobacteria;o__Actinomycetales;f__Micrococcaceae	-0.304692	0.0352324	2.47083e-05	6.075e-05	0.000133667	4.04545e-05	0.000171818	1.26667e-05
f4	k__Bacteria;p__"Actinobacteria";c__Actinobacteria;o__Actinomycetales;f__Actinomycetaceae	-0.305557	0.0346899	0.000117375	0.000159625	0.000360722	0.000109545	0.000327273	8.56667e-05
f59	k__Bacteria;p__Firmicutes;c__Clostridia;o__Clostridiales;f__Peptostreptococcaceae	-0.309067	0.0325596	0.0232791	0.0247509	0.0928264	0.0284391	0.0167606	0.026077
f21	k__Bacteria;p__"Proteobacteria";c__Alphaproteobacteria;o__Rhizobiales;f__Phyllobacteriaceae	-0.311386	0.0312124	6.55833e-05	0.0001315	0.000474667	0.000494091	0.000260818	0.000319
f20	k__Bacteria;p__"Proteobacteria";c__Alphaproteobacteria;o__Rhizobiales;f__Methylobacteriaceae	-0.3405	0.017879	8e-06	2.6e-05	4.02778e-05	2.08182e-05	2.27273e-05	1.3e-05
f43	k__Bacteria;p__Firmicutes;c__Bacilli;o__Bacillales;f__Staphylococcaceae	-0.350208	0.0146798	5.5e-06	3.0375e-05	5.57778e-05	5.03636e-05	0.000167727	2.6e-05
f33	k__Bacteria;p__"Proteobacteria";c__Gammaproteobacteria;o__Pseudomonadales;f__Moraxellaceae	-0.350709	0.0145288	0	3.5e-06	1.88333e-05	0	0	3.86667e-05
f37	k__Bacteria;p__"Verrucomicrobia";c__Verrucomicrobiae;o__Verrucomicrobiales;f__Verrucomicrobiaceae	-0.416484	0.00323487	0.000263792	0.000426875	0.000386556	0.0130464	0.000638818	0.000357667
Genus	Taxonomy	linear regression		Mean relative abundance
		Beta	p	nonT2D			T2D
				Lean	Overweight	Obese	Lean	Overweight	Obese
g76	k__Bacteria;p__Firmicutes;c__Clostridia;o__Clostridiales;f__Ruminococcaceae;g__Oscillibacter	0.578659	1.64634e-05	0.00255482	0.00159117	0.000898656	0.00224602	0.00131875	0.00201508
g28	k__Bacteria;p__"Proteobacteria";Other;Other;Other;Other	0.371115	0.00940823	0.000313693	0	0	0	0	0
g73	k__Bacteria;p__Firmicutes;c__Clostridia;o__Clostridiales;f__Ruminococcaceae;g__Faecalibacterium	0.340356	0.0179306	0.0920107	0.0774327	0.0641429	0.0868541	0.0670816	0.0894496
g85	k__Bacteria;p__Firmicutes;c__Negativicutes;o__Selenomonadales;f__Acidaminococcaceae;g__Phascolarctobacterium	0.284899	0.0496821	0.00336442	0.00182686	0.0015248	0.00377629	0.00187216	0
g4	k__Bacteria;p__"Actinobacteria";c__Actinobacteria;o__Actinomycetales;f__Actinomycetaceae;g__Actinomyces	-0.305447	0.0347587	0.000117384	0.000159708	0.000360755	0.000109699	0.00032728	8.57643e-05
g30	k__Bacteria;p__"Proteobacteria";c__Alphaproteobacteria;o__Rhizobiales;f__Phyllobacteriaceae;g__Phyllobacterium	-0.311356	0.0312295	6.55275e-05	0.000131402	0.000474636	0.00049414	0.00026093	0.000319148
g70	k__Bacteria;p__Firmicutes;c__Clostridia;o__Clostridiales;f__Peptostreptococcaceae;g__Romboutsia	-0.31549	0.0289415	0.0202563	0.0239634	0.0913477	0.0249378	0.0141906	0.0211836
g43	k__Bacteria;p__"Verrucomicrobia";c__Verrucomicrobiae;o__Verrucomicrobiales;f__Verrucomicrobiaceae;g__Akkermansia	-0.416486	0.00323469	0.000263811	0.000426869	0.000386547	0.0130465	0.00063879	0.00035756
OTU	Taxonomy	linear regression		Mean relative abundance
		Beta	p	nonT2D			T2D
				Lean	Overweight	Obese	Lean	Overweight	Obese
Otu89	k__Bacteria; p__Firmicutes; c__Clostridia; o__Clostridiales; f__Ruminococcaceae; g__Oscillibacter; s__Oscillibacter_valericigenes	0.511791	0.000200778	0.00168333	0.0011125	0.000577778	0.0017	0.000681818	0.00146667
Otu36	k__Bacteria; p__Firmicutes; c__Clostridia; o__Clostridiales; f__Lachnospiraceae; g__Coprococcus	0.349308	0.0149543	0.00422917	0.003375	0.0018	0.00511818	0.00305455	0.0027
Otu1	k__Bacteria; p__Firmicutes; c__Clostridia; o__Clostridiales; f__Ruminococcaceae; g__Faecalibacterium; s__Faecalibacterium_prausnitzii	0.347267	0.0155931	0.0922292	0.0778625	0.0777	0.0857364	0.067	0.0899333
Otu2	k__Bacteria; p__Firmicutes; c__Clostridia; o__Clostridiales; f__Lachnospiraceae	0.288312	0.0468946	0.0677083	0.0373	0.0450722	0.0383636	0.0581182	0.0478
Otu3	k__Bacteria; p__Firmicutes; c__Clostridia; o__Clostridiales; f__Peptostreptococcaceae; g__Romboutsia	-0.314952	0.0292312	0.0202458	0.0250125	0.0905222	0.0245273	0.0140818	0.0217667
Otu83	k__Bacteria; p__"Verrucomicrobia"; c__Verrucomicrobiae; o__Verrucomicrobiales; f__Verrucomicrobiaceae; g__Akkermansia; s__Akkermansia_muciniphila	-0.423716	0.00269111	0.0002625	0.000425	0.000388889	0.0129455	0.000772727	0.000366667

## Sheet: Supplementary Table S6
Supplementary Table S6| Correlation of bacteria families, genera, and OTUs to fat intake ratio (p < 0.05 in linear regression analysis)
Family	Taxonomy	linear regression		Mean relative abundance
		Beta	p	nonT2D			T2D
				Lean	Overweight	Obese	Lean	Overweight	Obese
f37	k__Bacteria;p__"Verrucomicrobia";c__Verrucomicrobiae;o__Verrucomicrobiales;f__Verrucomicrobiaceae	0.412244	0.00359678	0.000263792	0.000426875	0.000386556	0.0130464	0.000638818	0.000357667
f43	k__Bacteria;p__Firmicutes;c__Bacilli;o__Bacillales;f__Staphylococcaceae	0.375461	0.00854644	5.5e-06	3.0375e-05	5.57778e-05	5.03636e-05	0.000167727	2.6e-05
f20	k__Bacteria;p__"Proteobacteria";c__Alphaproteobacteria;o__Rhizobiales;f__Methylobacteriaceae	0.367166	0.0102554	8e-06	2.6e-05	4.02778e-05	2.08182e-05	2.27273e-05	1.3e-05
f21	k__Bacteria;p__"Proteobacteria";c__Alphaproteobacteria;o__Rhizobiales;f__Phyllobacteriaceae	0.35447	0.0134378	6.55833e-05	0.0001315	0.000474667	0.000494091	0.000260818	0.000319
f33	k__Bacteria;p__"Proteobacteria";c__Gammaproteobacteria;o__Pseudomonadales;f__Moraxellaceae	0.348235	0.0152874	0	3.5e-06	1.88333e-05	0	0	3.86667e-05
f59	k__Bacteria;p__Firmicutes;c__Clostridia;o__Clostridiales;f__Peptostreptococcaceae	0.322187	0.025532	0.0232791	0.0247509	0.0928264	0.0284391	0.0167606	0.026077
f4	k__Bacteria;p__"Actinobacteria";c__Actinobacteria;o__Actinomycetales;f__Actinomycetaceae	0.314571	0.0294375	0.000117375	0.000159625	0.000360722	0.000109545	0.000327273	8.56667e-05
f18	k__Bacteria;p__"Proteobacteria";Other;Other;Other	-0.289828	0.0456982	0.000313667	0	0	0	0	0
f60	k__Bacteria;p__Firmicutes;c__Clostridia;o__Clostridiales;f__Ruminococcaceae	-0.349781	0.0148096	0.194903	0.16558	0.129947	0.232687	0.157718	0.196264
f17	k__Bacteria;p__"Lentisphaerae";c__Oligosphaeria;o__Oligosphaerales;f__Oligosphaeraceae	-0.373257	0.00897468	8e-06	0	0	0	0	0
Genus	Taxonomy	linear regression		Mean relative abundance
		Beta	p	nonT2D			T2D
				Lean	Overweight	Obese	Lean	Overweight	Obese
g43	k__Bacteria;p__"Verrucomicrobia";c__Verrucomicrobiae;o__Verrucomicrobiales;f__Verrucomicrobiaceae;g__Akkermansia	0.412251	0.00359614	0.000263811	0.000426869	0.000386547	0.0130465	0.00063879	0.00035756
g30	k__Bacteria;p__"Proteobacteria";c__Alphaproteobacteria;o__Rhizobiales;f__Phyllobacteriaceae;g__Phyllobacterium	0.354463	0.0134396	6.55275e-05	0.000131402	0.000474636	0.00049414	0.00026093	0.000319148
g70	k__Bacteria;p__Firmicutes;c__Clostridia;o__Clostridiales;f__Peptostreptococcaceae;g__Romboutsia	0.326225	0.0236434	0.0202563	0.0239634	0.0913477	0.0249378	0.0141906	0.0211836
g4	k__Bacteria;p__"Actinobacteria";c__Actinobacteria;o__Actinomycetales;f__Actinomycetaceae;g__Actinomyces	0.314447	0.0295053	0.000117384	0.000159708	0.000360755	0.000109699	0.00032728	8.57643e-05
g28	k__Bacteria;p__"Proteobacteria";Other;Other;Other;Other	-0.289843	0.0456859	0.000313693	0	0	0	0	0
g73	k__Bacteria;p__Firmicutes;c__Clostridia;o__Clostridiales;f__Ruminococcaceae;g__Faecalibacterium	-0.352105	0.0141153	0.0920107	0.0774327	0.0641429	0.0868541	0.0670816	0.0894496
g76	k__Bacteria;p__Firmicutes;c__Clostridia;o__Clostridiales;f__Ruminococcaceae;g__Oscillibacter	-0.584539	1.2863e-05	0.00255482	0.00159117	0.000898656	0.00224602	0.00131875	0.00201508
OTU	Taxonomy	linear regression		Mean relative abundance
		Beta	p	nonT2D			T2D
				Lean	Overweight	Obese	Lean	Overweight	Obese
Otu83	k__Bacteria; p__"Verrucomicrobia"; c__Verrucomicrobiae; o__Verrucomicrobiales; f__Verrucomicrobiaceae; g__Akkermansia; s__Akkermansia_muciniphila	0.420312	0.00293604	0.0002625	0.000425	0.000388889	0.0129455	0.000772727	0.000366667
Otu3	k__Bacteria; p__Firmicutes; c__Clostridia; o__Clostridiales; f__Peptostreptococcaceae; g__Romboutsia	0.325925	0.0237795	0.0202458	0.0250125	0.0905222	0.0245273	0.0140818	0.0217667
Otu36	k__Bacteria; p__Firmicutes; c__Clostridia; o__Clostridiales; f__Lachnospiraceae; g__Coprococcus	-0.316247	0.0285378	0.00422917	0.003375	0.0018	0.00511818	0.00305455	0.0027
Otu1	k__Bacteria; p__Firmicutes; c__Clostridia; o__Clostridiales; f__Ruminococcaceae; g__Faecalibacterium; s__Faecalibacterium_prausnitzii	-0.357131	0.0127086	0.0922292	0.0778625	0.0777	0.0857364	0.067	0.0899333
Otu89	k__Bacteria; p__Firmicutes; c__Clostridia; o__Clostridiales; f__Ruminococcaceae; g__Oscillibacter; s__Oscillibacter_valericigenes	-0.534189	9.2085e-05	0.00168333	0.0011125	0.000577778	0.0017	0.000681818	0.00146667

## Sheet: Supplementary Table S7
Supplementary Table S7| Correlation of bacteria families, genera, and OTUs to protein intake ratio (p < 0.05 in linear regression analysis)
Family	Taxonomy	linear regression		Mean relative abundance
		Beta	p	nonT2D			T2D
				Lean	Overweight	Obese	Lean	Overweight	Obese
f15	k__Bacteria;p__"Fusobacteria";c__Fusobacteriia;o__"Fusobacteriales";f__"Fusobacteriaceae"	0.328573	0.0226002	0.000394958	0.00614187	0.00630978	5.2e-05	0.000507	0
f47	k__Bacteria;p__Firmicutes;c__Bacilli;o__Lactobacillales;f__Lactobacillaceae	0.304006	0.0356674	0.0108579	0.00561987	0.00676611	0.00895173	0.0219417	0.001865
f61	k__Bacteria;p__Firmicutes;c__Clostridia;o__Clostridiales;f__Ruminococcaceae	0.29458	0.0421074	0.194903	0.16558	0.129947	0.232687	0.157718	0.196264
f27	k__Bacteria;p__"Proteobacteria";c__Betaproteobacteria;o__Burkholderiales;f__Sutterellaceae	0.293958	0.0425635	0.00492321	0.00665	0.0037855	0.00225073	0.00241891	0.00534867
f18	k__Bacteria;p__"Proteobacteria";Other;Other;Other	-0.327456	0.0230914	0.000313667	0	0	0	0	0
Family	Taxonomy	linear regression		Mean relative abundance
		Beta	p	nonT2D			T2D
				Lean	Overweight	Obese	Lean	Overweight	Obese
g26	k__Bacteria;p__"Fusobacteria";c__Fusobacteriia;o__"Fusobacteriales";f__"Fusobacteriaceae";g__Fusobacterium	0.328594	0.022591	0.000395021	0.00614183	0.00630674	5.20004e-05	0.000159179	0
g47	k__Bacteria;p__Firmicutes;c__Bacilli;o__Lactobacillales;f__Leuconostocaceae;g__Weissella	0.30893	0.0326404	0.000492184	0.000769216	0.00215649	0.000996983	0.00365112	0.000519907
g34	k__Bacteria;p__"Proteobacteria";c__Betaproteobacteria;o__Burkholderiales;f__Sutterellaceae;g__Sutterella	0.295408	0.0415062	0.00433646	0.00646148	0.00357067	0.00169733	0.00188573	0.00519138
g39	k__Bacteria;p__"Proteobacteria";c__Gammaproteobacteria;o__"Enterobacteriales";f__Enterobacteriaceae;g__Plesiomonas	-0.302272	0.0367869	1.3e-06	0	0.000644989	1.6531e-05	0	0
g37	k__Bacteria;p__"Proteobacteria";c__Gammaproteobacteria;o__"Enterobacteriales";f__Enterobacteriaceae;Other	-0.313505	0.0300218	0.0115312	0.0107955	0.0141119	0.00628327	0.0134187	0.00661612
g28	k__Bacteria;p__"Proteobacteria";Other;Other;Other;Other	-0.327456	0.0230916	0.000313693	0	0	0	0	0
g75	k__Bacteria;p__Firmicutes;c__Clostridia;o__Clostridiales;f__Ruminococcaceae;g__Gemmiger	-0.328384	0.0226825	0.021124	0.0186917	0.0215822	0.0255757	0.0261364	0.0406558
Family	Taxonomy	linear regression		Mean relative abundance
		Beta	p	nonT2D			T2D
				Lean	Overweight	Obese	Lean	Overweight	Obese
Otu73	k__Bacteria; p__"Fusobacteria"; c__Fusobacteriia; o__"Fusobacteriales"; f__"Fusobacteriaceae"; g__Fusobacterium	0.332099	0.0211064	0.000470833	0.0061625	0.00617222	5.45455e-05	0.000181818	0
Otu77	k__Bacteria; p__Firmicutes; c__Bacilli; o__Lactobacillales; f__Leuconostocaceae; g__Weissella; s__Weissella_cibaria	0.306649	0.0340149	0.000466667	0.0007375	0.00208333	0.00106364	0.00379091	0.000533333
Otu19	k__Bacteria; p__Firmicutes; c__Clostridia; o__Clostridiales; f__Ruminococcaceae; g__Ruminococcus; s__Ruminococcus_bromii	-0.286411	0.0484311	0.0197542	0.0119625	0.01015	0.0286909	0.0165364	0.00786667
Otu505	k__Bacteria; p__"Proteobacteria"; c__Gammaproteobacteria; o__"Enterobacteriales"; f__Enterobacteriaceae	-0.375648	0.0085111	0.0052125	0.0045875	0.00619444	0.00264545	0.00524545	0.0024

## Sheet: Supplementary Table S8
Supplementary Table S8| Bacterial families, genera, and OTUs significantly correlated with BMI (p < 0.05 in linear regression analysis adjusted by total energy intake)
Family	Taxonomy	linear regression		Mean relative abundance
		Beta	p	nonT2D			T2D
				Lean	Overweight	Obese	Lean	Overweight	Obese
f33	k__Bacteria;p__"Proteobacteria";c__Gammaproteobacteria;o__Pseudomonadales;f__Moraxellaceae	0.45962	0.00027729	0	3.5e-06	1.88333e-05	0	0	3.86667e-05
f5	k__Bacteria;p__"Actinobacteria";c__Actinobacteria;o__Actinomycetales;f__Micrococcaceae	0.421768	0.000956915	2.47083e-05	6.075e-05	0.000133667	4.04545e-05	0.000171818	1.26667e-05
f21	k__Bacteria;p__"Proteobacteria";c__Alphaproteobacteria;o__Rhizobiales;f__Phyllobacteriaceae	0.40374	0.00166679	6.55833e-05	0.0001315	0.000474667	0.000494091	0.000260818	0.000319
f4	k__Bacteria;p__"Actinobacteria";c__Actinobacteria;o__Actinomycetales;f__Actinomycetaceae	0.403616	0.00196693	0.000117375	0.000159625	0.000360722	0.000109545	0.000327273	8.56667e-05
f59	k__Bacteria;p__Firmicutes;c__Clostridia;o__Clostridiales;f__Peptostreptococcaceae	0.393244	0.00231573	0.0232791	0.0247509	0.0928264	0.0284391	0.0167606	0.026077
f43	k__Bacteria;p__Firmicutes;c__Bacilli;o__Bacillales;f__Staphylococcaceae	0.383948	0.00319258	5.5e-06	3.0375e-05	5.57778e-05	5.03636e-05	0.000167727	2.6e-05
f20	k__Bacteria;p__"Proteobacteria";c__Alphaproteobacteria;o__Rhizobiales;f__Methylobacteriaceae	0.289525	0.0297938	8e-06	2.6e-05	4.02778e-05	2.08182e-05	2.27273e-05	1.3e-05
f47	k__Bacteria;p__Firmicutes;c__Bacilli;o__Lactobacillales;f__Leuconostocaceae	0.272795	0.0409585	0.000520375	0.000777125	0.00220744	0.001137	0.00377527	0.000545333
f13	k__Bacteria;p__"Bacteroidetes";c__"Bacteroidia";o__"Bacteroidales";f__Bacteroidaceae	-0.30922	0.0197027	0.0446744	0.0197623	0.0212371	0.0656395	0.0364149	0.0271253
f55	k__Bacteria;p__Firmicutes;c__Clostridia;o__Clostridiales;f__Eubacteriaceae	-0.337599	0.00985613	0.0117881	0.00957488	0.00699544	0.0103863	0.012167	0.0131647
f12	k__Bacteria;p__"Bacteroidetes";c__"Bacteroidia";o__"Bacteroidales";f__"Rikenellaceae"	-0.341127	0.0113683	0.00641917	0.00347537	0.00137533	0.00717127	0.00262864	0.00872267
f60	k__Bacteria;p__Firmicutes;c__Clostridia;o__Clostridiales;f__Ruminococcaceae	-0.463294	0.000293136	0.194903	0.16558	0.129947	0.232687	0.157718	0.196264
Genus	Taxonomy	linear regression		Mean relative abundance
		Beta	p	nonT2D			T2D
				Lean	Overweight	Obese	Lean	Overweight	Obese
g70	k__Bacteria;p__Firmicutes;c__Clostridia;o__Clostridiales;f__Peptostreptococcaceae;g__Romboutsia	0.405328	0.00162545	0.0202563	0.0239634	0.0913477	0.0249378	0.0141906	0.0211836
g30	k__Bacteria;p__"Proteobacteria";c__Alphaproteobacteria;o__Rhizobiales;f__Phyllobacteriaceae;g__Phyllobacterium	0.403765	0.00166555	6.55275e-05	0.000131402	0.000474636	0.00049414	0.00026093	0.000319148
g4	k__Bacteria;p__"Actinobacteria";c__Actinobacteria;o__Actinomycetales;f__Actinomycetaceae;g__Actinomyces	0.403547	0.00197056	0.000117384	0.000159708	0.000360755	0.000109699	0.00032728	8.57643e-05
g79	k__Bacteria;p__Firmicutes;c__Erysipelotrichia;o__Erysipelotrichales;f__Erysipelotrichaceae;g__Clostridium_XVIII	0.316215	0.016693	0.0029415	0.00506577	0.00595987	0.0065619	0.00445793	0.0031753
g47	k__Bacteria;p__Firmicutes;c__Bacilli;o__Lactobacillales;f__Leuconostocaceae;g__Weissella	0.276388	0.0384857	0.000492184	0.000769216	0.00215649	0.000996983	0.00365112	0.000519907
g69	k__Bacteria;p__Firmicutes;c__Clostridia;o__Clostridiales;f__Peptostreptococcaceae;g__Intestinibacter	-0.300868	0.0223397	0.00302272	0.000787482	0.00147872	0.00350119	0.00256984	0.00489356
g24	k__Bacteria;p__"Bacteroidetes";c__"Bacteroidia";o__"Bacteroidales";f__Bacteroidaceae;g__Bacteroides	-0.309221	0.0197024	0.0446744	0.0197623	0.021237	0.0656395	0.0364149	0.0271253
g74	k__Bacteria;p__Firmicutes;c__Clostridia;o__Clostridiales;f__Ruminococcaceae;g__Flavonifractor	-0.312531	0.0223914	0.000226135	0.000164856	8.45546e-05	0.00107554	0.00016975	0.000114874
g54	k__Bacteria;p__Firmicutes;c__Clostridia;o__Clostridiales;f__Eubacteriaceae;g__Eubacterium	-0.337595	0.00985721	0.0117879	0.00957491	0.00699541	0.0103864	0.012167	0.0131644
g23	k__Bacteria;p__"Bacteroidetes";c__"Bacteroidia";o__"Bacteroidales";f__"Rikenellaceae";g__Alistipes	-0.341125	0.011369	0.00641919	0.00347535	0.00137548	0.00717109	0.00262842	0.00872248
g77	k__Bacteria;p__Firmicutes;c__Clostridia;o__Clostridiales;f__Ruminococcaceae;g__Ruminococcus	-0.350253	0.00727143	0.040984	0.0325035	0.0234535	0.0654512	0.0458021	0.0455773
g16	k__Bacteria;p__"Bacteroidetes";c__"Bacteroidia";o__"Bacteroidales";f__"Porphyromonadaceae";g__Butyricimonas	-0.370167	0.00432128	0.000546957	0.000666116	6.16734e-05	0.000350637	0.0001999	0.000356954
g61	k__Bacteria;p__Firmicutes;c__Clostridia;o__Clostridiales;f__Lachnospiraceae;g__Coprococcus	-0.378408	0.00389135	0.0288322	0.0260577	0.0129581	0.0245415	0.0283825	0.0294069
g76	k__Bacteria;p__Firmicutes;c__Clostridia;o__Clostridiales;f__Ruminococcaceae;g__Oscillibacter	-0.459925	0.000802084	0.00255482	0.00159117	0.000898656	0.00224602	0.00131875	0.00201508
OTU	Taxonomy	linear regression		Mean relative abundance
		Beta	p	nonT2D			T2D
				Lean	Overweight	Obese	Lean	Overweight	Obese
Otu3	k__Bacteria; p__Firmicutes; c__Clostridia; o__Clostridiales; f__Peptostreptococcaceae; g__Romboutsia	0.405646	0.00160999	0.0202458	0.0250125	0.0905222	0.0245273	0.0140818	0.0217667
Otu33	k__Bacteria; p__Firmicutes; c__Erysipelotrichia; o__Erysipelotrichales; f__Erysipelotrichaceae; g__Clostridium_XVIII	0.317023	0.0164066	0.00285833	0.0048	0.00565	0.0061	0.00377273	0.0031
Otu77	k__Bacteria; p__Firmicutes; c__Bacilli; o__Lactobacillales; f__Leuconostocaceae; g__Weissella; s__Weissella_cibaria	0.269783	0.0438555	0.000466667	0.0007375	0.00208333	0.00106364	0.00379091	0.000533333
Otu100	k__Bacteria; p__Firmicutes; c__Clostridia; o__Clostridiales; f__Lachnospiraceae	-0.263309	0.0492392	0.0029125	0.0025	0.00162778	0.0025	0.00301818	0.0027
Otu40	k__Bacteria; p__Firmicutes; c__Clostridia; o__Clostridiales; f__Lachnospiraceae; g__Coprococcus; s__Coprococcus_comes	-0.263898	0.0468715	0.00427917	0.0031125	0.00312222	0.00302727	0.00296364	0.00383333
Otu306	k__Bacteria; p__"Bacteroidetes"; c__"Bacteroidia"; o__"Bacteroidales"; f__Bacteroidaceae; g__Bacteroides; s__Bacteroides_ovatus	-0.26732	0.0437826	0.0027875	0.0002	0.000383333	0.00358182	0.000672727	0.0005
Otu335	k__Bacteria; p__Firmicutes; c__Clostridia; o__Clostridiales; f__Lachnospiraceae; g__Coprococcus; s__Coprococcus_eutactus	-0.269144	0.0440317	0.0116083	0.0028375	0.00223333	0.00575455	0.00237273	0.0078
Otu135	k__Bacteria; p__Firmicutes; c__Clostridia; o__Clostridiales; f__Lachnospiraceae	-0.272976	0.0427242	0.00123333	0.001225	0.00045	0.00163636	0.00229091	0.000933333
Otu333	k__Bacteria; p__Firmicutes; c__Clostridia; o__Clostridiales; f__Ruminococcaceae; g__Gemmiger; s__Gemmiger_formicilis	-0.285825	0.030705	0.00869167	0.0060125	0.00373889	0.0114909	0.00678182	0.00686667
Otu49	k__Bacteria; p__Firmicutes; c__Clostridia; o__Clostridiales; f__Eubacteriaceae; g__Eubacterium; s__Eubacterium_coprostanoligenes	-0.286508	0.0307783	0.00349583	0.0013375	0.000838889	0.00341818	0.00101818	0.000933333
Otu54	k__Bacteria; p__Firmicutes; c__Clostridia; o__Clostridiales; f__Peptostreptococcaceae; g__Intestinibacter; s__Intestinibacter_bartlettii	-0.29269	0.0264888	0.00305417	0.0007625	0.00146667	0.00360909	0.00240909	0.00566667
Otu35	k__Bacteria; p__Firmicutes; c__Clostridia; o__Clostridiales; f__Ruminococcaceae	-0.299798	0.0295863	0.00587917	0.005775	0.00173333	0.00503636	0.00318182	0.00273333
Otu80	k__Bacteria; p__Firmicutes; c__Clostridia; o__Clostridiales; f__Lachnospiraceae	-0.304505	0.0207661	0.00322083	0.0017375	0.00147222	0.00382727	0.00192727	0.00143333
Otu19	k__Bacteria; p__Firmicutes; c__Clostridia; o__Clostridiales; f__Ruminococcaceae; g__Ruminococcus; s__Ruminococcus_bromii	-0.30488	0.0230989	0.0197542	0.0119625	0.01015	0.0286909	0.0165364	0.00786667
Otu34	k__Bacteria; p__Firmicutes; c__Clostridia; o__Clostridiales; f__Lachnospiraceae	-0.306723	0.020031	0.00579167	0.00295	0.00216111	0.00518182	0.00347273	0.00336667
Otu125	k__Bacteria; p__"Bacteroidetes"; c__"Bacteroidia"; o__"Bacteroidales"; f__Bacteroidaceae; g__Bacteroides; s__Bacteroides_thetaiotaomicron	-0.360089	0.00587446	0.00130833	0.0006	0.000322222	0.00539091	0.00272727	0.0012
Otu92	k__Bacteria; p__"Bacteroidetes"; c__"Bacteroidia"; o__"Bacteroidales"; f__Bacteroidaceae; g__Bacteroides; s__Bacteroides_xylanisolvens	-0.361075	0.00683598	0.0018125	0.00135	0.000294444	0.00361818	0.000436364	0.00116667
Otu58	k__Bacteria; p__Firmicutes; c__Clostridia; o__Clostridiales	-0.374375	0.00399291	0.0023625	0.0008125	0.00045	0.00358182	0.00211818	0.0024
Otu488	k__Bacteria; p__Firmicutes; c__Clostridia; o__Clostridiales; f__Lachnospiraceae	-0.376447	0.00390671	0.00157083	0.0009375	0.000688889	0.00271818	0.000981818	0.0024
Otu45	k__Bacteria; p__Firmicutes; c__Clostridia; o__Clostridiales; f__Ruminococcaceae; g__Ruminococcus	-0.420674	0.00137423	0.00587083	0.0029625	0.000527778	0.00758182	0.00626364	0.00653333
Otu36	k__Bacteria; p__Firmicutes; c__Clostridia; o__Clostridiales; f__Lachnospiraceae; g__Coprococcus	-0.464958	0.00029272	0.00422917	0.003375	0.0018	0.00511818	0.00305455	0.0027

## Sheet: Supplementary Table S9
Supplementary Table S9| Bacterial families, genera, and OTUs significantly correlated with FBG (p < 0.05 in linear regression analysis using inverse squares of FBG as independent variable and adjusted by age and BMI)
Family	Taxonomy	linear regression		Mean relative abundance
		Beta	p	nonT2D			T2D
				Lean	Overweight	Obese	Lean	Overweight	Obese
f15	k__Bacteria;p__"Fusobacteria";c__Fusobacteriia;o__"Fusobacteriales";f__"Fusobacteriaceae"	0.248949	0.032008	0.000394958	0.00614187	0.00630978	5.2e-05	0.000507	0
f27	k__Bacteria;p__"Proteobacteria";c__Betaproteobacteria;o__Burkholderiales;f__Sutterellaceae	0.244417	0.0366956	0.00492321	0.00665	0.0037855	0.00225073	0.00241891	0.00534867
f37	k__Bacteria;p__"Verrucomicrobia";c__Verrucomicrobiae;o__Verrucomicrobiales;f__Verrucomicrobiaceae	-0.247742	0.0344588	0.000263792	0.000426875	0.000386556	0.0130464	0.000638818	0.000357667
f41	k__Bacteria;p__Firmicutes;c__Bacilli;o__Bacillales;f__Bacillaceae_1	-0.282464	0.0160489	1.7875e-05	8e-06	1.18889e-05	0.000340364	0.000182455	0
Genus	Taxonomy	linear regression		Mean relative abundance
		Beta	p	nonT2D			T2D
				Lean	Overweight	Obese	Lean	Overweight	Obese
g34	k__Bacteria;p__"Proteobacteria";c__Betaproteobacteria;o__Burkholderiales;f__Sutterellaceae;g__Sutterella	0.249379	0.0334194	0.00433646	0.00646148	0.00357067	0.00169733	0.00188573	0.00519138
g26	k__Bacteria;p__"Fusobacteria";c__Fusobacteriia;o__"Fusobacteriales";f__"Fusobacteriaceae";g__Fusobacterium	0.248953	0.032005	0.000395021	0.00614183	0.00630674	5.20004e-05	0.000159179	0
g58	k__Bacteria;p__Firmicutes;c__Clostridia;o__Clostridiales;f__Lachnospiraceae;g__Butyrivibrio	-0.245524	0.0356	0.000540715	0.00268996	0.00012421	0.014455	0.00181252	0.000628147
g7	k__Bacteria;p__"Actinobacteria";c__Actinobacteria;o__Coriobacteriales;f__Coriobacteriaceae;g__Asaccharobacter	-0.245655	0.0400809	0.000232589	2.0032e-05	6.38536e-05	0.000199058	0.000293682	0.000703283
g43	k__Bacteria;p__"Verrucomicrobia";c__Verrucomicrobiae;o__Verrucomicrobiales;f__Verrucomicrobiaceae;g__Akkermansia	-0.247742	0.0344592	0.000263811	0.000426869	0.000386547	0.0130465	0.00063879	0.00035756
g81	k__Bacteria;p__Firmicutes;c__Erysipelotrichia;o__Erysipelotrichales;f__Erysipelotrichaceae;g__Erysipelotrichaceae_incertae_sedis	-0.26925	0.0219342	4.59029e-05	1.22375e-05	1.96427e-05	0.00101637	4.85775e-05	0
g74	k__Bacteria;p__Firmicutes;c__Clostridia;o__Clostridiales;f__Ruminococcaceae;g__Flavonifractor	-0.348745	0.00337526	0.000226135	0.000164856	8.45546e-05	0.00107554	0.00016975	0.000114874
OTU	Taxonomy	linear regression		Mean relative abundance
		Beta	p	nonT2D			T2D
				Lean	Overweight	Obese	Lean	Overweight	Obese
Otu73	k__Bacteria; p__"Fusobacteria"; c__Fusobacteriia; o__"Fusobacteriales"; f__"Fusobacteriaceae"; g__Fusobacterium	0.250706	0.0307488	0.000470833	0.0061625	0.00617222	5.45455e-05	0.000181818	0
Otu42	k__Bacteria; p__Firmicutes; c__Clostridia; o__Clostridiales; f__Lachnospiraceae; g__Butyrivibrio	-0.242538	0.0380898	0.000529167	0.0028375	0.000116667	0.0147	0.00174545	0.0007
Otu83	k__Bacteria; p__"Verrucomicrobia"; c__Verrucomicrobiae; o__Verrucomicrobiales; f__Verrucomicrobiaceae; g__Akkermansia; s__Akkermansia_muciniphila	-0.249767	0.032952	0.0002625	0.000425	0.000388889	0.0129455	0.000772727	0.000366667
Otu135	k__Bacteria; p__Firmicutes; c__Clostridia; o__Clostridiales; f__Lachnospiraceae	-0.262972	0.0343811	0.00123333	0.001225	0.00045	0.00163636	0.00229091	0.000933333
Otu125	k__Bacteria; p__"Bacteroidetes"; c__"Bacteroidia"; o__"Bacteroidales"; f__Bacteroidaceae; g__Bacteroides; s__Bacteroides_thetaiotaomicron	-0.272024	0.0246205	0.00130833	0.0006	0.000322222	0.00539091	0.00272727	0.0012
Otu23	k__Bacteria; p__"Bacteroidetes"; c__"Bacteroidia"; o__"Bacteroidales"; f__Bacteroidaceae; g__Bacteroides; s__Bacteroides_dorei	-0.293047	0.0145467	0.0158042	0.0057875	0.00523889	0.0295545	0.0167455	0.0107
Otu28	k__Bacteria; p__"Actinobacteria"; c__Actinobacteria; o__Bifidobacteriales; f__Bifidobacteriaceae; g__Bifidobacterium	-0.296812	0.0101194	0.0022875	0.0008	0.00414444	0.00803636	0.0101273	0.00463333
Otu151	k__Bacteria; p__"Bacteroidetes"; c__"Bacteroidia"; o__"Bacteroidales"; f__Bacteroidaceae; g__Bacteroides	-0.433532	0.00025261	0.000591667	1.25e-05	0.000133333	0.0065	0.000445455	6.66667e-05

## Sheet: Supplementary Table S10
Supplementary Table S10| Level of fecal bile acids in lean, over weight, and obese subjects
Conjugated Form	Name	Lean	Over Weight	Obese
Primary Bile Acid	CA	2.27342	2.44468	6.9603
	CDCA	2.28512	4.22546	9.27092
Secondary Bile Acid (7α-dehydroxylated)	DCA	17.3899	18.4867	8.87576
	LCA	10.8403	8.43464	4.98953
Seondary Bile Acid (7β-hydroxy)	UDCA	2.98153	0.397232	1.21417
Glycine Conjugated	GCA	0.0817002	0.0490497	0.0305558
	GCDCA	0.150466	0.194854	0.0968017
	GDCA	0.0298503	0.025894	0.013004
	GLCA	0.00337092	0.00245753	0.00189749
	GUDCA	0.00502315	0.00326042	0.002658
Taurine Conjugated	TCA	0.0285724	0.000550806	0.00123214
	TCDCA	0.0507377	0.0717272	0.15715
	TDCA	0.0318784	0.0538915	0.0573527
	TLCA	0.00457413	0.00790968	0.00760338
	TUDCA	0.00155893	0.00162248	0.00547882
Total Bile Acids	Total BA	36.158	34.3999	31.6844
*The values represent mean by group (μmol/g dry feces)

[truncated: 2 more sheets: Supplementary Table S11, Supplementary Table S12]
